# Supplementary material for: Plasmodium falciparum K13 mutations in Africa and Asia impact artemisinin resistance and parasite fitness
Source: eLife. 2021 Jul 19;10:e66277. doi: 10.7554/eLife.66277 (PMC8321553; doi:10.7554/eLife.66277)
Supplement: Figure 1—source data 1. [file elife-66277-fig1-data1.xlsx]

## Sheet: Figure 1–source data 1
Figure 1–source data 1. Distribution of K13 alleles over time in African countries (2011-2019).
Year(s) of sample collection	2014-2016	2016	2017-2018	2015	2017-2019	2014-2015, 2017-2019	2014	2015-2016, 2019	2011-2012, 2015	2012-2015	2016-2017
K13	The Gambia	Sierra Leonea	Burkina Fasob	Chadc	CARd	Rep. of the Congo	Equatorial Guineae	Burundi	Tanzaniaf	Rwandag	Somaliah	Total
WT	308	270	352	30	183	316	96	382	183	871	137	3128
SYN	3	2	8	1	3	12	0	7	4	11	0	51
M460I	0	0	0	0	0	0	0	0	0	1	0	1
L463S	0	0	0	0	0	0	0	0	1	0	0	1
C469F	0	0	0	0	0	0	0	0	0	1	0	1
C469Y	0	0	0	0	0	0	0	0	0	1	0	1
M476I	0	0	0	0	0	0	0	0	1	0	0	1
V487I	0	0	0	0	0	0	0	0	0	1	0	1
G496S	0	0	0	0	0	0	0	0	1	0	0	1
V510M	0	0	0	0	0	0	0	0	1	0	0	1
R513L	0	0	0	0	0	0	0	0	0	1	0	1
V517I	0	0	2	0	0	0	0	0	0	0	0	2
V555A	0	0	0	0	0	0	0	0	0	6	0	6
A557S	0	0	0	0	0	5	0	0	0	0	0	5
R561H	0	0	0	0	0	0	0	0	0	20	0	20
M562T	0	0	0	0	0	0	0	0	1	0	0	1
P574L	0	0	0	0	0	0	0	0	0	1	0	1
R575I	0	0	0	0	0	0	0	0	0	2	0	2
A578S	0	3	3	0	0	0	2	0	0	2	0	10
A578V	0	0	0	0	0	0	0	0	0	1	0	1
V589A	0	0	1	0	0	0	0	0	0	0	0	1
E602D	0	0	0	0	0	0	0	0	1	0	0	1
V603I	0	0	0	0	0	1	0	0	0	0	0	1
E605K	0	0	0	0	0	0	0	0	0	1	0	1
R622I	0	0	0	0	0	0	0	0	0	0	1	1
A626E	0	0	0	0	0	0	0	0	0	1	0	1
N629Y	0	0	1	0	0	0	0	0	0	0	0	1
H644L	1	0	0	0	0	0	0	0	0	0	0	1
I646T	0	3	0	0	0	0	0	0	0	0	0	3
E651K	0	0	0	0	0	0	0	0	0	1	0	1
Y653N	0	0	0	0	1	0	0	0	0	0	0	1
V666I	1	0	0	0	0	0	0	0	0	0	0	1
P667R	0	0	0	0	0	0	0	0	0	4	0	4
V520I+V637I	0	0	0	0	0	1	0	0	0	0	0	1
V568M+V603I	0	0	0	0	0	1	0	0	0	0	0	1
G592E+V637I	0	0	0	0	0	0	0	0	0	1	0	1
Total	313	278	367	31	187	336	98	389	193	927	138	3257
% WT	0.99361	0.978417	0.980926	1	0.994652	0.97619	0.979592	1	0.968912	0.951456	0.992754	0.976052
Results show number of samples sequenced harboring a given K13 allele in the designated country and year.
aSmith et al. 2018. Efficacy of artemisinin-based combination therapies and prevalence of molecular markers associated with artemisinin, piperaquine and sulfadoxine-pyrimethamine resistance in Sierra Leone. Acta Trop 185:363-370. DOI: 10.1016/j.actatropica.2018.06.016. PMID: 29932931
bGansané et al. 2021. Anti-malarial efficacy and resistance monitoring of artemether-lumefantrine and dihydroartemisinin-piperaquine shows inadequate efficacy in children in Burkina Faso, 2017–2018. Malaria J 20:48. DOI: 10.1186/s12936-021-03585-6. PMID: 33468147
cVachot-Ganée et al. 2018. A novel field-based molecular assay to detect validated artemisinin-resistant k13 mutants. Malar J 17:175. DOI: 10.1186/s12936-018-2329-y. PMID: 29690890
dNzoumbou‑Boko et al. 2020. Molecular assessment of kelch13 non‑synonymous mutations in Plasmodium falciparum isolates from Central African Republic (2017–2019). Malar J 19:191. DOI: 10.1186/s12936-020-03264-y. PMID: 32448203
eLi et al. 2016. Limited artemisinin resistance-associated polymorphisms in Plasmodium falciparum K13-propeller and PfATPase6 gene isolated from Bioko Island, Equatorial Guinea. Int J Parasitol Drugs Drug Resist 6:54-59. doi: 10.1016/j.ijpddr.2015.11.002. PMID: 27054064
fKakolwa et al. 2018. Efficacy and safety of artemisinin-based combination therapy, and molecular markers for artemisinin and piperaquine resistance in Mainland Tanzania. Malar J 17:369. DOI: 10.1186/s12936-018-2524-x. PMID: 30333022
gUwimana A et al. 2020. Emergence and clonal expansion of in vitro artemisinin-resistant Plasmodium falciparum kelch13 R561H mutant parasites in Rwanda. Nat Med 26:1602-1608. DOI: 10.1038/s41591-020-1005-2. PMID: 32747827
hWarsame et al. 2019. High therapeutic efficacy of artemether–lumefantrine and dihydroartemisinin–piperaquine for the treatment of uncomplicated falciparum malaria in Somalia. Malar J 18:231. DOI: 10.1186/s12936-019-2864-1. PMID: 31296223
Percentage WT refers to the percentage of samples that were wild-type for K13 or that harbored a synonynous mutation in K13.
CAR, Central African Republic; SYN, K13 synonymous mutation; WT, wild type.
