# Supplementary material for: Plasmodium falciparum K13 mutations in Africa and Asia impact artemisinin resistance and parasite fitness
Source: eLife. 2021 Jul 19;10:e66277. doi: 10.7554/eLife.66277 (PMC8321553; doi:10.7554/eLife.66277)
Supplement: Figure 2—source data 1. [file elife-66277-fig2-data1.xlsx]

## Sheet: Figure 2–source data 1
Figure 2–source data 1. Ring-stage survival (RSA) assay data for K13 edited African parasites and controls.
Parasite	Parent	K13	Editing method	RSA survivala
				Mean	SEM	Nb	P valuec
3D7WT	--	WT	--	1.38	0.269	4	--
3D7ctrl	3D7WT	WT	CRISPR-Cas9	1.27	0.219	3	0.78 (ns)
3D7R561H	3D7WT	R561H	CRISPR-Cas9	6.62	0.3	3	<0.0001 (****)
3D7M579I	3D7WT	M579I	CRISPR-Cas9	4.83	0.612	3	0.0023 (**)
3D7C580Y	3D7WT	C580Y	CRISPR-Cas9	4.75	0.441	4	0.0006 (***)
F32WT	--	WT	--	0.257	0.0429	7	--
F32R561H	F32WT	R561H	CRISPR-Cas9	0.417	0.159	3	0.21 (ns)
F32M579I	F32WT	M579I	CRISPR-Cas9	0.483	0.0946	6	0.043 (*)
F32C580Y	F32WT	C580Y	CRISPR-Cas9	0.263	0.042	8	0.9304
UG659WT	--	WT	--	1	0.121	6	--
UG659M579I	UG659WT	M579I	CRISPR-Cas9	6.32	0.731	6	<0.0001 (****)
UG659C580Y	UG659WT	C580Y	CRISPR-Cas9	4.67	1	6	0.0046 (**)
UG815WT	--	WT	--	1.33	0.166	7	--
UG815M579I clone 1	UG815WT	M579I	CRISPR-Cas9	11.9	1	7	<0.0001 (****)
UG815M579I clone 2	UG815WT	M579I	CRISPR-Cas9	11.8	0.816	7	<0.0001 (****)
UG815C580Y	UG815WT	C580Y	CRISPR-Cas9	11.8	1.46	7	<0.0001 (****)
Dd2WT	--	WT	--	0.64	0.085	13	--
Dd2M579I	Dd2WT	M579I	CRISPR-Cas9	4	0.45	10	<0.0001 (****)
Dd2C580Y	Dd2WT	C580Y	ZFN	4.7	0.37	9	<0.0001 (****)
aRSA survival values represent the percentage of parasites surviving a 6 h pulse of 700nM dihydroartemisinin, calculated relative to DMSO mock-treated controls. Parasitemias were determined 66 h following drug treatment.
bN, number of independent experiments, each with technical duplicates.
cP value calculated for relative to the respective wild-type parental line. P value determined by unpaired t test. ns, not significant. * P<0.05; ** P<0.01, *** P<0.001, **** P<0.0001.
ctrl, control (denotes line with silent gRNA shield mutations only); SEM, standard error of the mean; WT, wild-type.
