# Supplementary material for: Plasmodium falciparum K13 mutations in Africa and Asia impact artemisinin resistance and parasite fitness
Source: eLife. 2021 Jul 19;10:e66277. doi: 10.7554/eLife.66277 (PMC8321553; doi:10.7554/eLife.66277)
Supplement: Figure 3—source data 1. [file elife-66277-fig3-data1.xlsx]

## Sheet: Figure 3–source data 1
Figure 3–source data 1. Fitness assay data for K13 edited African parasite lines and controls.
	3D7WT vs. 3D7R561H			3D7WT vs. 3D7M579I			3D7WT vs. 3D7C580Y			F32WT vs. F32R561H			F32 vs. 3D7M579I			F32 vs. F32C580Y			UG659 vs. UG659M579I			UG659 vs. UG659C580Y			UG815 vs. UG815M579I			UG815 vs. UG815C580Y
Day	Meana	SEM	Nb	Mean	SEM	N	Mean	SEM	N	Mean	SEM	N	Mean	SEM	N	Mean	SEM	N	Mean	SEM	N	Mean	SEM	N	Mean	SEM	N	Mean	SEM	N
0	53.4379	2.1195	2	51.3852	9.16762	4	42.7666	7.3891	4	49.3156	0.30125	2	53.7208	2.31721	5	36.7956	5.17512	5	48.2312	7.64558	5	58.1374	5.35314	3	47.354	5.58521	4	56.505	6.445	2
2	56.3218	0	1	26.087	0	1	13.1589	0	1	--	--	--	56.3998	--	1	41.7428	--	1	--	--	--	--	--	--	34.6128	--	1	27.7933	--	1
4	56.2244	0.97465	2	39.1507	5.10893	3	34.0202	2.63518	3	47.4903	4.95665	2	50.9683	2.05187	4	41.0573	3.29783	4	48.5694	4.221	4	59.8975	4.04205	3	50.8096	2.39505	2	37.8101	--	1
6	--	--	--	43.8947	--	1	20.4774	--	1	--	--	--	56.5496	--	1	37.9584	--	1	59.2011	--	1	--	--	--	43.6343	6.9848	2	21.4694	--	1
8	55.9706	1.08765	2	55.5937	7.1329	4	47.7499	9.88473	4	44.3255	4.8596	2	50.1717	2.19822	5	38.8894	3.19735	5	47.4525	3.40411	5	57.475	4.24579	3	42.6996	7.09102	4	21.9703	2.47195	2
12	53.82	1.8511	2	35.145	5.383	4	32.2183	5.43755	4	43.0278	4.6237	2	47.3239	2.4412	5	33.8562	5.15129	5	50.2449	4.97824	5	54.9745	2.79973	3	34.2071	7.82962	4	20.9585	3.17515	2
16	51.697	0.32575	2	26.207	5.53234	4	29.2612	6.31345	4	39.4399	6.4062	2	45.0844	2.30852	5	30.6944	6.26017	5	52.6832	7.83408	5	50.6691	5.29346	3	30.2651	10.038	4	15.9835	3.6494	2
20	53.0069	0.0881	2	27.4252	3.80906	4	35.0215	7.7304	4	36.6546	5.9484	2	36.8739	4.51413	5	26.1984	6.08129	5	50.1603	8.10046	5	45.4838	2.29234	3	26.8969	11.91	4	11.9668	3.716	2
24	53.1993	1.418	2	15.1429	5.36505	4	21.3191	2.4662	4	32.8299	3.91605	2	31.8965	3.61262	5	28.1965	6.57319	5	49.8159	8.56874	5	43.2628	4.61478	3	22.5599	12.0443	4	10.8555	3.10683	2
28	51.7754	0.4325	2	10.6144	7.4411	4	22.3501	3.7524	4	28.1929	4.01685	2	31.2049	3.66933	5	28.1483	6.42702	5	46.437	7.46535	5	39.8754	6.53248	3	18.7103	10.9982	4	9.53988	0.268275	2
32	49.1754	0.6871	2	11.656	5.99367	4	15.7082	2.06578	4	24.2274	6.1096	2	27.8704	4.11386	5	26.2202	6.39986	5	47.9273	8.92581	5	34.1219	9.79166	3	17.5159	10.7725	4	7.447	2.5623	2
36	49.5257	2.1578	2	12.7815	6.27039	3	13.1361	8.09962	3	24.3339	5.82365	2	30.6333	4.0266	4	26.1115	7.64784	4	49.7234	10.2184	4	38.6829	10.7447	2	17.0552	6.5978	4	5.89917	0.886025	2
aFraction of K13 mutant parasites determined by allelic descrimination via TaqMan qPCR.
bN, number of independent experiments, each performed in duplicate.
n/a, not applicable. SEM, standard error of the mean.
