# Supplementary material for: Plasmodium falciparum K13 mutations in Africa and Asia impact artemisinin resistance and parasite fitness
Source: eLife. 2021 Jul 19;10:e66277. doi: 10.7554/eLife.66277 (PMC8321553; doi:10.7554/eLife.66277)
Supplement: Figure 4—source data 1. [file elife-66277-fig4-data1.xlsx]

## Sheet: Figure 4–source data 1
Figure 4–source data 1. Distribution of K13 alleles over time in Cambodia (2001-2017).
Years of sample collection	2001-02				2004-05				2006-07				2008-09				2010-11				2012-13				2014-15				2016-17
K13	W	N	E	S	W	N	E	S	W	N	E	S	W	N	E	S	W	N	E	S	W	N	E	S	W	N	E	S	W	N	E	S	Total
WT	58	25	66	n/a	30	27	30	n/a	9	48	22	n/a	19	n/a	n/a	n/a	46	110	104	4	12	59	225	13	18	31	74	2	0	68	93	1	1194
G449A	0	0	0	n/a	0	0	0	n/a	0	0	0	n/a	2	n/a	n/a	n/a	0	0	0	0	0	0	0	0	0	0	0	0	0	0	0	0	2
N458Y	0	0	0	n/a	0	0	0	n/a	0	0	0	n/a	0	n/a	n/a	n/a	2	0	0	1	0	0	0	0	0	0	0	0	0	0	0	0	3
C469F	0	0	0	n/a	0	0	0	n/a	0	0	0	n/a	0	n/a	n/a	n/a	0	0	0	0	0	0	0	0	0	0	1	0	0	0	0	0	1
T474I	0	0	1	n/a	0	0	0	n/a	0	1	0	n/a	0	n/a	n/a	n/a	0	0	0	0	0	0	0	0	0	0	0	0	0	0	0	0	2
A481V	0	0	0	n/a	1	0	0	n/a	1	0	0	n/a	2	n/a	n/a	n/a	0	0	0	0	0	0	0	0	0	0	0	0	0	0	0	0	4
N489D	0	0	0	n/a	0	0	0	n/a	0	0	0	n/a	0	n/a	n/a	n/a	0	0	0	0	0	0	0	0	0	2	0	0	0	0	0	0	2
Y493H	6	0	0	n/a	0	0	0	n/a	9	0	0	n/a	17	n/a	n/a	n/a	18	21	1	0	0	5	0	0	5	1	0	0	0	0	0	0	83
I543T	0	0	0	n/a	0	0	0	n/a	0	0	0	n/a	0	n/a	n/a	n/a	1	0	3	0	0	0	0	0	0	0	0	0	0	0	0	0	4
G533S	0	0	1	n/a	0	0	0	n/a	0	0	0	n/a	0	n/a	n/a	n/a	0	0	0	0	0	0	0	0	0	0	0	0	0	0	0	0	1
N537D	0	0	0	n/a	0	0	0	n/a	0	0	0	n/a	0	n/a	n/a	n/a	0	0	0	0	0	0	0	0	0	1	0	0	0	0	0	0	1
R539T	8	1	0	n/a	5	0	0	n/a	7	0	0	n/a	18	n/a	n/a	n/a	15	21	0	2	1	6	1	0	1	0	0	0	0	0	1	0	87
P553L	0	0	0	n/a	0	0	0	n/a	0	0	0	n/a	0	n/a	n/a	n/a	0	0	0	1	0	0	1	0	0	0	2	0	0	0	1	0	5
R561H	8	0	0	n/a	1	0	0	n/a	0	0	0	n/a	0	n/a	n/a	n/a	0	0	0	0	0	0	0	0	0	0	0	0	0	0	0	0	9
V568G	0	0	0	n/a	0	0	0	n/a	0	0	0	n/a	0	n/a	n/a	n/a	0	0	2	0	0	0	0	0	0	0	0	0	0	0	0	0	2
P574L	0	0	1	n/a	3	0	0	n/a	0	0	0	n/a	0	n/a	n/a	n/a	0	0	0	0	0	0	0	0	0	0	0	0	0	0	0	0	4
C580Y	23	0	0	n/a	41	0	0	n/a	39	0	0	n/a	47	n/a	n/a	n/a	191	90	50	11	180	42	16	37	189	156	71	7	33	207	405	80	1915
D584V	0	0	0	n/a	0	0	0	n/a	0	0	0	n/a	4	n/a	n/a	n/a	0	0	0	0	0	0	1	0	0	0	0	0	0	0	0	0	5
K610R	0	0	0	n/a	0	0	0	n/a	0	0	0	n/a	0	n/a	n/a	n/a	0	0	0	0	0	0	0	0	0	1	0	0	0	1	0	0	2
A626E	0	0	0	n/a	0	0	0	n/a	0	0	0	n/a	0	n/a	n/a	n/a	0	0	0	0	0	0	0	0	0	0	1	0	0	0	0	0	1
Total	103	26	69	n/a	81	27	30	n/a	65	49	22	n/a	109	n/a	n/a	n/a	273	242	160	19	193	112	244	50	213	192	149	9	33	276	500	81	3327
% WT	0.563107	0.961538	0.956522	n/a	0.37037	1	1	n/a	0.138462	0.979592	1	n/a	0.174312	n/a	n/a	n/a	0.168498	0.454545	0.65	0.210526	0.0621762	0.526786	0.922131	0.26	0.084507	0.161458	0.496644	0.222222	0	0.246377	0.186	0.0123457	0.359483
% C580Y	0.223301	0	0	n/a	0.506173	0	0	n/a	0.6	0	0	n/a	0.431193	n/a	n/a	n/a	0.699634	0.371901	0.3125	0.578947	0.932642	0.375	0.0655738	0.74	0.887324	0.8125	0.47651	0.777778	1	0.75	0.81	0.987654	0.575594
2001-2012 data were previously published in Ariey et al. 2014. A molecular marker of artemisinin-resistant Plasmodium falciparum malaria. Nature 505:50-5. DOI: 10.1038/nature12876. PMID: 24352242
2013-2014 data were previously published in Ménard et al. 2016. A worldwide map of Plasmodium falciparum K13-propeller polymorphisms. N Engl J Med 374:2453-64. DOI: 10.1056/NEJMoa1513137. PMID: 27332904
Results show number of samples sequenced harboring a given K13 allele in each of four regions of Cambodia during a given span of time. W, Western; N, Northern; E, Eastern; S, Southern.
n/a, not available; WT, wild type.
