# Supplementary material for: Plasmodium falciparum K13 mutations in Africa and Asia impact artemisinin resistance and parasite fitness
Source: eLife. 2021 Jul 19;10:e66277. doi: 10.7554/eLife.66277 (PMC8321553; doi:10.7554/eLife.66277)
Supplement: Figure 5—source data 1. [file elife-66277-fig5-data1.xlsx]

## Sheet: Figure 5–source data 1
Figure 5–source data 1. Ring-stage survival (RSA) assay data for K13 edited SE Asian parasites and controls (Dd2 and Cam3.II strains).
Parasite	Parent	K13	Editing method	RSA survivala
				Mean	SEM	Nb	P valuec
Dd2WT	--	WT	--	0.64	0.085	13	--
Dd2ctrl	Dd2	WT	CRISPR-Cas9	0.88	0.14	5	0.16 (ns)
Dd2E252Q	Dd2	E252Q	ZFN	0.5	0.21	5	0.47 (ns)
Dd2F446I	Dd2	F446I	CRISPR-Cas9	2	0.44	6	0.0004 (***)
Dd2P553L	Dd2	P553L	CRISPR-Cas9	4.6	0.67	11	<0.0001 (****)
Dd2R561H	Dd2	R561H	CRISPR-Cas9	4.3	0.42	7	<0.0001 (****)
Dd2P574L	Dd2	P574L	CRISPR-Cas9	2.1	0.32	8	<0.0001 (****)
Dd2C580Y	Dd2	C580Y	ZFN	4.7	0.37	9	<0.0001 (****)
Dd2R539T	Dd2	R539T	ZFN	20	--	1	<0.0001 (****)
Cam3.IIWT	Cam3.IIR539T	WT (rev)	ZFN	1.52	0.521	5	--
Cam3.IIctrl	Cam3.IIWT	WT	CRISPR-Cas9	1.85	0.05	2	0.72 (ns)
Cam3.IIE252Q	Cam3.IIWT	E252Q	CRISPR-Cas9	1	0.1		0.58 (ns)
Cam3.IIF446I	Cam3.IIWT	F446I	CRISPR-Cas9	1.85	0.815	4	0.73 (ns)
Cam3.IIP553L	Cam3.IIWT	P553L	CRISPR-Cas9	2.8	0.416	3	0.14 (ns)
Cam3.IIP574L	Cam3.IIWT	P574L	CRISPR-Cas9	2.74	1.2	5	0.38 (ns)
Cam3.IIR561H	Cam3.IIWT	R561H	CRISPR-Cas9	13.2	1.3	6	<0.0001 (****)
Cam3.IIC580Y	Cam3.IIR539T	C580Y	ZFN	10	--	1	<0.0001 (****)
Cam3.IIR539T	--	R539T	--	20.4	1.33	3	<0.0001 (****)
aRSA survival values represent the percentage of parasites surviving a 6 h pulse of 700nM dihydroartemisinin, calculated relative to DMSO mock-treated controls. Parasitemias were determined 66 h following drug treatment.
bN, number of independent experiments, each with technical duplicates.
cP value calculated for relative to the respective wild-type parental line. P value determined by unpaired t test. ns, not significant. *** P<0.001, **** P<0.0001.
ctrl, control (denotes line with silent gRNA shield mutations only); rev, revertant (denotes a line in which mutation has been removed by gene editing); SEM, standard error of the mean; WT, wild-type; ZFN, zinc-finger nuclease.
