# Supplementary material for: Plasmodium falciparum K13 mutations in Africa and Asia impact artemisinin resistance and parasite fitness
Source: eLife. 2021 Jul 19;10:e66277. doi: 10.7554/eLife.66277 (PMC8321553; doi:10.7554/eLife.66277)
Supplement: Figure 5—source data 2. [file elife-66277-fig5-data2.xlsx]

## Sheet: Figure 5–source data 2
Figure 5–source data 2. Fitness assay data (percent eGFP+ parasites) for K13 edited Dd2 parasites and parental control.
	Dd2WT			Dd2ctrl			Dd2E252Q			Dd2F446I			Dd2P553L			Dd2R561H			Dd2P574L			Dd2C580Y
Day	Meana	SEM	Nb	Mean	SEM	N	Mean	SEM	N	Mean	SEM	N	Mean	SEM	N	Mean	SEM	N	Mean	SEM	N	Mean	SEM	N
0	48.8689	1.36221	3	49.8756	1.33016	3	48.1789	4.21598	3	50.2167	1.21085	3	50.7622	3.56095	3	47.1411	3.0424	3	45.24	0.727694	3	50.3078	1.37564	3
2	40.0233	3.70866	3	41.8878	2.84788	3	43.7889	1.89595	3	42.5889	7.59992	3	41.5756	4.52474	3	43.0367	4.51263	3	39.4856	5.77514	3	46.2278	4.30383	3
4	34.575	0.71167	2	38.5583	1.29167	2	44.4517	4.475	2	36.9783	4.39166	2	38.965	2.41167	2	39.4217	1.46166	2	34.9183	5.30833	2	42.7917	0.308335	2
6	32.06	0.34333	2	38.1933	1.37	2	45.02	4.16333	2	36.255	3.67833	2	37.6217	0.338335	2	39.5767	2.32	2	33.6483	2.97833	2	39.1717	3.23167	2
8	25.4517	1.305	2	33.1017	0.345	2	40.4967	6.82	2	32.5417	0.285	2	27.1283	0.708335	2	35.8583	4.43834	2	29.4467	1.84	2	30.6517	3.595	2
10	22.41	--	1	32.0067	--	1	28.7867	--	1	28.5	--	1	23.48	--	1	33.68	--	1	24.8333	--	1	24.5433	--	1
12	15.29	1.11667	2	24.805	2.115	2	25.7617	0.291665	2	22.04	1.49	2	20.0817	0.231665	2	27.2867	1.13	2	19.11	0.48	2	17.985	0.77833	2
14	14.3244	1.85626	3	21.5656	0.456556	3	28.2622	4.59999	3	18.8011	0.715419	3	16.28	1.71583	3	25.1356	0.427315	3	15.6578	1.5627	3	17.1478	1.99484	3
16	14.0867	3.21184	3	24.6178	2.10382	3	29.4789	5.46828	3	19.55	2.50344	3	17.2522	3.53609	3	26.4611	4.10376	3	17.0778	2.39679	3	15.3644	4.49742	3
18	8.89333	1.12667	2	16.7517	1.75167	2	23.0483	5.84833	2	14.0167	1.22666	2	11.4933	2.12	2	21.3933	3.92	2	10.5617	1.265	2	11.7167	2.73333	2
20	6.95556	0.991968	3	13.8622	1.79531	3	17.7322	3.48691	3	10.9944	1.86394	3	9.01	1.61165	3	15.6533	2.88975	3	8.47333	2.48579	3	6.60333	1.38292	3
aPercent eGFP+ parasites determined by flow cytometry as a fraction of total (MitoTracker+) parasite population.
bN, number of independent experiments, each performed in triplicate.
ctrl, control (gRNA binding-site mutations only); SEM, standard error of the mean; WT, wild-type.
