# Supplementary material for: Plasmodium falciparum K13 mutations in Africa and Asia impact artemisinin resistance and parasite fitness
Source: eLife. 2021 Jul 19;10:e66277. doi: 10.7554/eLife.66277 (PMC8321553; doi:10.7554/eLife.66277)
Supplement: Figure 6—source data 1. [file elife-66277-fig6-data1.xlsx]

## Sheet: Figure 6–source data 1
Figure 6–source data 1. Ring-stage survival (RSA) assay data for K13 edited Thai parasites and controls.
Parasite	Parent	K13	Editing method	RSA survivala
				Mean	SEM	Nb	P valuec
Thai1WT	--	WT	--	1	0.2	7	--
Thai1E252Q	Thai1WT	E252Q	ZFN	0.4	0.058	3	0.09 (ns)
Thai1R561H	Thai1WT	R561H	CRISPR-Cas9	7.2	1.5	4	0.001 (**)
Thai1C580Y	Thai1WT	C580Y	ZFN	2.1	0.33	4	0.02 (ns)
Thai2WT	--	WT	--	1.5	0.55	3	--
Thai2R561H	Thai2WT	R561H	ZFN	14.5	1.7	5	0.0014 (**)
Thai2C580Y	Thai2WT	C580Y	ZFN	11.5	1.6	4	0.004 (**)
Thai3WT	--	WT	--	0.6	0.058	3	--
Thai3E252Q	Thai3WT	E252Q	ZFN	1.1	0.42	3	0.33 (ns)
Thai4WT	--	WT	--	0.43	0.12	3	--
Thai4C580Y	Thai4WT	C580Y	ZFN	15.4	0.96	3	0.0001 (***)
Thai5WT	--	WT	--	1.2	0.15	3	--
Thai5E252Q	Thai5WT	E252Q	ZFN	1.4	0.1	3	0.33 (ns)
Thai5R561H	Thai5WT	R561H	ZFN	12.7	1.4	4	0.0013 (**)
Thai5C580Y	Thai5WT	C580Y	ZFN	7.6	1.2	4	0.0071 (**)
Thai6E252Q	--	E252Q	--	2.68	0.312	4	--
Thai7E252Q	--	E252Q	--	5.12	0.759	4	--
aRSA survival values represent the percentage of parasites surviving a 6 h pulse of 700nM dihydroartemisinin, calculated relative to DMSO mock-treated controls. Parasitemias were determined 66 h following drug treatment.
bN, number of independent experiments, each with technical duplicates.
cP value calculated for relative to the respective wild-type parental line. P value determined by unpaired t test. ns, not significant. ** P<0.01, *** P<0.001.
SEM, standard error of the mean; WT, wild-type; ZFN, zinc-finger nuclease.
