# Supplementary material for: Plasmodium falciparum K13 mutations in Africa and Asia impact artemisinin resistance and parasite fitness
Source: eLife. 2021 Jul 19;10:e66277. doi: 10.7554/eLife.66277 (PMC8321553; doi:10.7554/eLife.66277)
Supplement: Figure 7—source data 1. [file elife-66277-fig7-data1.xlsx]

## Sheet: Figure 7–source data 1
Figure 7–source data 1. Ring-stage survival (RSA) assay data for fd and mdr2 edited parasites and controls.
						RSA survivalb
Parasite	Parent	K13	fd	mdr2a	Editing method (locus)	Mean	SEM	Nc	P valued
CamWTC580Y (CamWTfd D193)	CamWT	C580Y	WT	T484	ZFN (K13)	11	1.7	2	--
CamWTfd D193Y	CamWTfd D193	C580Y	D193Y	T484	CRISPR-Cas9 (fd)	12.5	1.7	2	0.5798 (ns)
RF7C580Y (RF7fd D193Y)	--	C580Y	D193Y	T484I	--	27.1	1.5	3	--
RF7fd D193Y ctrl	RF7fd D193Y	C580Y	D193Y	T484I	CRISPR-Cas9 (fd)	27.2	2.3	3	0.9823 (ns)
RF7fd D193 rev	RF7fd D193Y	C580Y	WT (rev)	T484I	CRISPR-Cas9 (fd)	26.7	2.7	3	0.9151 (ns)
Cam3.IIC580Y (Cam3.IImdr2 T484I)	Cam3.IIR539T	C580Y	D193Y	T484I	ZFN (K13)	18.5	1.7	3	--
Cam3.IImdr2 T484I ctrl	Cam3.IImdr2 T484I	C580Y	D193Y	T484I	CRISPR-Cas9 (mdr2)	21.2	1.9	3	0.3457 (ns)
Cam3.IImdr2 T484 rev	Cam3.IImdr2 T484I	C580Y	D193Y	T484 (rev)	CRISPR-Cas9 (mdr2)	21.8	3.3	3	0.4235 (ns)
aAll parasites tested carry the S208N/G299D/F423Y mutations in mdr2 and as such are not designated as wild-type (WT).
bRSA survival values represent the percentage of parasites surviving a 6 h pulse of 700nM dihydroartemisinin, calculated relative to DMSO mock-treated controls. Parasitemias were determined 66 h following drug treatment.
cN, number of independent experiments, each with technical duplicates.
dP value calculated relative to the respective parental line. Student's t test. ns, not significant.
ctrl, control (denotes line with silent gRNA shield mutations only); rev, revertant (denotes a line in which mutation has been removed by gene editing); SEM, standard error of the mean; WT, wild-type.
