# Supplementary material for: Plasmodium falciparum K13 mutations in Africa and Asia impact artemisinin resistance and parasite fitness
Source: eLife. 2021 Jul 19;10:e66277. doi: 10.7554/eLife.66277 (PMC8321553; doi:10.7554/eLife.66277)
Supplement: Figure 7—source data 2. [file elife-66277-fig7-data2.xlsx]

## Sheet: Figure 7–source data 2
Figure 7–source data 2. Fitness assay data (percent eGFP+ parasites) for RF7 fd edited parasites and parental control.
	RF7fd D193Y			RF7fd D193Y ctrl			RF7fd D193 rev
Day	Mean	SEM	N	Mean	SEM	N	Meana	SEM	Nb
0	10.5067	0.441827	3	9.69667	1.65716	3	11.8933	2.54664	3
2	22.2244	1.31235	3	21.5078	0.403	3	21.8122	1.54619	3
5	45.8578	7.51378	3	49.1011	10.9938	3	45.8644	8.93168	3
7	63.9489	6.39216	3	65.2411	9.62218	3	61.5256	8.48711	3
9	81.5878	6.56298	3	80.5233	7.46584	3	78.0311	6.82342	3
12	94.1211	0.634123	3	94.7778	0.885045	3	91.9289	0.372719	3
14	96.1678	0.780101	3	96.38	0.570812	3	95.1078	0.797088	3
16	97.9856	0.328009	3	98.4667	0.254871	3	97.7922	0.384945	3
19	99.0433	0.0283497	3	99.1633	0.285002	3	98.5256	0.187086	3
21	99.3989	0.250971	3	99.3244	0.0411561	3	99.1222	0.300742	3
23	98.9367	0.572173	3	99.3411	0.203099	3	98.9422	0.310181	3
aPercent eGFP+ parasites determined by flow cytometry as a fraction of total (MitoTracker+) parasite population.
bN, number of independent experiments, each performed in triplicate.
ctrl, control (denotes line with silent gRNA shield mutations only); rev, revertant (denotes line that has been reverted to wild-type at the given position by gene editing); SEM, standard error of the mean.
