# Supplementary material for: Plasmodium falciparum K13 mutations in Africa and Asia impact artemisinin resistance and parasite fitness
Source: eLife. 2021 Jul 19;10:e66277. doi: 10.7554/eLife.66277 (PMC8321553; doi:10.7554/eLife.66277)
Supplement: Figure 7—source data 3. [file elife-66277-fig7-data3.xlsx]

## Sheet: Figure 7–source data 3
Figure 7–source data 3. Fitness assay data (percent eGFP+ parasites) for Cam3.II mdr2 edited parasites and parental control.
	Cam3.IImdr2 T484I			Cam3.IImdr2 T484I ctrl			Cam3.IImdr2 T484 rev
Day	Meana	SEM	Nb	Mean	SEM	N	Mean	SEM	N
0	8.6	1.23	2	12.41	1.27	2	11.065	1.435	2
2	11.6467	0.106667	2	14.9633	1.12333	2	12.4733	0.323333	2
5	28.9017	5.50833	2	35.115	3.32167	2	29.64	5.85667	2
7	33.1017	3.005	2	40.1483	1.405	2	36.8183	5.445	2
9	39.87	2.60667	2	49.6467	3.36667	2	46.7733	5.35333	2
12	48.785	8.10833	2	61.6367	5.66333	2	55.2283	7.295	2
14	56.77	6.05333	2	70.82	5.21333	2	63.1717	4.905	2
16	66.4767	5.94333	2	79.4517	4.53833	2	72.795	2.33833	2
19	75.11	2.46333	2	85.4217	0.381667	2	83.65	0.51	2
21	78.0683	2.175	2	89.3467	0.0733333	2	86.085	0.0383333	2
23	82.5617	0.611667	2	92.3917	0.961667	2	89.135	0.188333	2
26	92.83	0.533333	2	96.9883	0.0783333	2	95.8967	0.116667	2
28	93.2633	--	1	97.7533	--	1	96.4733	--	1
30	95.66	--	1	98.93	--	1	97.41	--	1
aPercent eGFP+ parasites determined by flow cytometry as a fraction of total (MitoTracker+) parasite population.
bN, number of independent experiments, each performed in triplicate.
ctrl, control (denotes line with silent gRNA shield mutations only); rev, revertant (denotes line that has been reverted to wild-type at the given position by gene editing); SEM, standard error of the mean.
