# Supplementary material for: Plasmodium falciparum K13 mutations in Africa and Asia impact artemisinin resistance and parasite fitness
Source: eLife. 2021 Jul 19;10:e66277. doi: 10.7554/eLife.66277 (PMC8321553; doi:10.7554/eLife.66277)
Supplement: Supplementary file 1. [file elife-66277-supp1.xlsx]

## Sheet: Supplementary file 1
Supplementary file 1. Sample information and approval from within-country ethics committees for K13 genotyping data.
Country	Year(s) of sample collection	Referencea	Ethics committee/study approval
The Gambia	2014-2016	Unpublished data	The Gambian Government/MRC Joint Ethics Committee (SCC 1497v2).
Sierra Leone	2016	Smith et al. 2018. DOI: 10.1016/j.actatropica.2018.06.016	Sierra Leone Ethics and Scientific Review Committee (Trial registration number ACTRN12618000517279).
Burkina Faso	2017-2018	Gansané et al. 2021. DOI: 10.1186/s12936-021-03585-6	Institutional Ethics Committee of CNRFP and the Health Research Ethics Committee of Burkina Faso (PACTR201708002499311).
Chad	2015	Vachot-Ganée et al. 2018. DOI: 10.1186/s12936-018-2329-y	Ministère de l'enseignement supérieur (04/PR/PM/MESRS/SG/DGESRS/DRST/15) and Ministère de la Santé in Chad (1776/PR/PM/MSP/SE/SG/DGAS/DSPELM/DMTNT/PNLP/15).
Central African Republic	2017-2019	Nzoumbou‑Boko et al. 2020. DOI: 10.1186/s12936‑020‑03264‑y	The National Malaria Control Programme in Central African Republic.
Republic of the Congo	2014-2015	Unpublished data	Comité d'Éthique de la Recherche en Sciences de la Santé (CERSSA) and Ministère de la Recherche, Congo. 072 MRS/DGRST/CERSSA (2012), 059 DGRST/CERSSA (2015), 056 MRSIT/IRSSA/CERSSA (2016), 089 MRSIT/IRSSA/CERSSA (2018).
	2017-2019	Unpublished data
Equatorial Guinea	2014	Li et al. 2016. DOI: 10.1016/j.ijpddr.2015.11.002	Ethics committees of Malabo Regional Hospital, Equatorial Guinea.
Burundi	2015-2016	Unpublished data	Comité National d’Etique du Burundi (6 Nov 2014 and 18 Sept 2018).
	2019	Unpublished data
Tanzania	2011-2012	Kakolwa et al. 2018. DOI: 10.1186/s12936-018-2524-x	The Ifakara Health Institute (IHI) ethics review committee (ERC), the National Medical Research Coordinating Committee (MRCC) of the National Institute for Medical Research (NIMR), and the WHO research ethics review committee.
	2015
Rwanda	2012-2015	Uwimana et al. 2020. DOI: 10.1038/s41591-020-1005-2	The Rwanda National Ethics Committee on 16 May 2012 (RNEC129/RNEC/2012). ISRCTN63145981 (http://www.isrctn.com/ISRCTN63145981).
Somalia	2016-2017	Warsame et al. 2019. DOI: 10.1186/s12936-019-2864-1	The Ministry of Health of the Federal Government of Somalia, the Ministry of Health of Puntland, and the WHO Research Ethics Review Committee. ACTRN12616001005448 (Jowhar DP study), ACTRN12616000553471 (Bosaso DP study).
Cambodia	2001-2012	Ariey et al. 2014. DOI: 10.1038/nature12876	The Cambodian National Ethics Committee for Health Research, the Institutional Review Board of the Naval Medical Research Center, the Technical Review Group of the WHO Regional Office for the Western Pacific, and the Institutional Review Board of the National Institute of Allergy and Infectious Diseases.
	2013-2014	Ménard et al. 2016. DOI: 10.1056/NEJMoa1513137
	2015-2017	Unpublished data
aFull references provided in Figure 1–source data 1 and Figure 4–source data 1.
For the following countries, K13 genotyping was performed at the Pasteur Institute in Paris, France: The Gambia, Sierra Leone, Burkina Faso, Central African Republic, Republic of the Congo, Burundi, Tanzania, and Rwanda.
For the following countries, K13 genotyping was performed at the Pasteur Institute in Phnom Penh, Cambodia: Chad, Cambodia
