# Supplementary material for: Plasmodium falciparum K13 mutations in Africa and Asia impact artemisinin resistance and parasite fitness
Source: eLife. 2021 Jul 19;10:e66277. doi: 10.7554/eLife.66277 (PMC8321553; doi:10.7554/eLife.66277)
Supplement: Supplementary file 4. [file elife-66277-supp4.xlsx]

## Sheet: Supplementary file 4
Supplementary file 4. Geographic origin and drug resistance genotypes of Plasmodium falciparum clinical isolates and reference lines employed in this study.
Parasite	Sanger ID	Original ID	Edited? (parent)a	Provider	Geographic origin or source	Year	K13	pfcrtb	mdr1	mdr1 copy number	dhfrc	dhps	fd	mdr2d	arps10	ap-2m	ubp1
3D7WT	--	3D7 clone A10	no	D. Goldberg	Africa	1981	WT	WT	WT	1	WT	WT	D193Y	WT	WT	WT	WT
F32WT	--	--	no	F. Benoit-Vical	Tanzania	1982	WT	WT	WT	1	WT	S436A	WT	S208N/F423Y/I492V	WT	S160N	WT
UG659WT	--	--	no	P. Rosenthal	Uganda	2007	WT	GB4	Y184F/Y927N	1	triple	K540E	WT	S208N/F423Y/I492V	WT	WT	E1528D
UG815WT	--	--	no	P. Rosenthal	Uganda	2008	WT	GB4	N86Y/D1246Y	1	triple	K540E	WT	S208N	WT	WT	WT
Dd2WT	--	Dd2 clone B2	no	MR4	Indochina	1980	WT	Dd2	N86Y	3	triple	S436F/A613S	D193Y	quadruple	WT	WT	WT
Dd2I543T	--	--	yes (Dd2)	This lab	Straimer et al.	2015	I543T	Dd2	N86Y	3	triple	S436F/A613S	D193Y	quadruple	WT	WT	WT
Dd2C580Y	--	--	yes (Dd2)	This lab	Straimer et al.	2015	C580Y	Dd2	N86Y	3	triple	S436F/A613S	D193Y	quadruple	WT	WT	WT
Cam3.IIR539T	PH0306-C	Cam3.II; RF967	no	R. Fairhurst	Cambodia	2010	R539T	Dd2	Y184F	1	triple	S436A/K540E	D193Y	quadruple	V127M/D128H	WT	WT
Cam3.IIWT	--	Cam3.IIrev	yes (Cam3.II)	This lab	Straimer et al.	2015	WT	Dd2	Y184F	1	triple	S436A/K540E	D193Y	quadruple	V127M/D128H	WT	WT
Cam3.IIC580Y	--	--	yes (Cam3.II)	This lab	Straimer et al.	2015	C580Y	Dd2	Y184F	1	triple	S436A/K540E	D193Y	quadruple	V127M/D128H	WT	WT
CamWT	PH0164-C	RF915	no	R. Fairhurst	Cambodia	2010	WT	Dd2	WT	1	triple	S436A/K540E	WT	triple	V127M/D128H	WT	WT
CamWTC580Y	--	--	yes (CamWT)	This lab	Straimer et al.	2015	C580Y	Dd2	WT	1	triple	S436A/K540E	WT	triple	V127M/D128H	WT	WT
RF7C580Y	PH1008-C	163-KH1-001RNE	no	R. Fairhurst	Cambodia	2012	C580Y	Dd2 + M343L	Y184F	1	quadruple	K540N/A581G	D193Y	quadruple	V127M/D128H	WT	WT
Thai1WT	--	TA32A2A4	no	T. Anderson	Thailand	2003	WT	Dd2	N86Y	1	double	K540E/A581G	D193Y	quadruple	V127M/D128H	WT	WT
Thai2WT	--	TA50A2B2	no	T. Anderson	Thailand	2004	WT	Dd2	F1226Y	2	quadruple	K540E/A581G	D193Y	quadruple	V127M/D128H	WT	R3138H
Thai3WT	--	TA85R1	no	T. Anderson	Thailand	2003	WT	Dd2	F1226Y	1	triple	S436A/K540E	D193Y	triple	WT	WT	WT
Thai4WT	--	TA86A3	no	T. Anderson	Thailand	2003	WT	Dd2	F1226Y	1	double	K540E/A581G	D193Y	quadruple	D128Y	WT	WT
Thai5WT	--	NHP-01334-6B	no	T. Anderson	Thailand	2011	WT	Dd2	F1226Y	1	quadruple	K540E/A581G	D193Y	quadruple	V127M/D128H	WT	WT
Thai6E252Q	--	NHP4076	no	T. Anderson	Thailand	2008	E252Q	Dd2	F1226Y	2	quadruple	K540N/A581G	D193Y	quadruple	V127M/D128H	WT	WT
Thai7E252Q	--	NHP4673	no	T. Anderson	Thailand	2010	E252Q	Dd2	WT	2	triple	K540N/A581G	D193Y	quadruple	V127M/D128H	WT	WT
aGene-edited parasite lines were generated by zinc-finger nuclease editing and were previously reported in Straimer et al. 2015. K13-propeller mutations confer artemisinin resistance in Plasmodium falciparum clinical isolates. Science 347:428-431. DOI: 10.1126/science.1260867. PMID: 25502314
bDd2 pfcrt: M74I/N75E/K76T/A220S/Q271E/N326S/I356T/R371I; GB4 pfcrt: M74I/N75E/K76T/A220S/Q271E/R371I.
cDouble dhfr mutant: C95R/S108N; Triple dhfr mutant: N51I/C59R/S108N; Quadruple dhfr mutant: N51I/C59R/S108N/I164L.
dTriple mdr2 mutant: S208N/G299D/F423Y; quadruple mdr2 mutant: S208N/G299D/F423Y/T484I.
K13, Kelch13, PF3D7_1343700; pfcrt, Plasmodium falciparum chloroquine resistance transporter, PF3D7_0709000; mdr1, multi-drug resistance protein 1, PF3D7_0523000; dhfr, dihydrofolate reductase, PF3D7_0417200; dhps, dihydropteroate synthase, PF3D7_0810800; fd, ferredoxin, PF3D7_1318100; mdr2, multi-drug resistance protein 2, PF3D7_1447900; arps10, apicoplast ribosomal protein S10, PF3D7_1460900.1;…
