# Supplementary material for: Plasmodium falciparum K13 mutations in Africa and Asia impact artemisinin resistance and parasite fitness
Source: eLife. 2021 Jul 19;10:e66277. doi: 10.7554/eLife.66277 (PMC8321553; doi:10.7554/eLife.66277)
Supplement: Supplementary file 5. [file elife-66277-supp5.xlsx]

## Sheet: Figure 2–source data 1
Supplementary file 5. Transgenic Plasmodium falciparum lines generated in this study.
Parasite	Parent	K13	Editing method	Sourcea
3D7ctrl	3D7WT	WT	CRISPR-Cas9	This study
3D7R561H	3D7WT	R561H	CRISPR-Cas9	This study
3D7M579I	3D7WT	M579I	CRISPR-Cas9	This study
3D7C580Y	3D7WT	C580Y	CRISPR-Cas9	This study
F32R561H	F32WT	R561H	CRISPR-Cas9	This study
F32M579I	F32WT	M579I	CRISPR-Cas9	This study
F32C580Y	F32WT	C580Y	CRISPR-Cas9	This study
UG659M579I	UG659WT	M579I	CRISPR-Cas9	This study
UG659C580Y	UG659WT	C580Y	CRISPR-Cas9	This study
UG815M579I clone 1	UG815WT	M579I	CRISPR-Cas9	This study
UG815M579I clone 2	UG815WT	M579I	CRISPR-Cas9	This study
UG815C580Y	UG815WT	C580Y	CRISPR-Cas9	This study
Dd2ctrl	Dd2WT	WT	CRISPR-Cas9	This study
Dd2E252Q	Dd2WT	E252Q	ZFN	This study
Dd2F446I	Dd2WT	F446I	CRISPR-Cas9	This study
Dd2R539T	Dd2WT	R539T	ZFN	Straimer et al.
Dd2P553L	Dd2WT	P553L	CRISPR-Cas9	This study
Dd2R561H	Dd2WT	R561H	CRISPR-Cas9	This study
Dd2P574L	Dd2WT	P574L	CRISPR-Cas9	This study
Dd2M579I	Dd2WT	M579I	CRISPR-Cas9	This study
Dd2C580Y	Dd2WT	C580Y	ZFN	Straimer et al.
Cam3.IIWT	Cam3.IIR539T	WT (rev)	ZFN	Straimer et al.
Cam3.IIctrl	Cam3.IIWT	WT	CRISPR-Cas9	Cam3.IIctrl
Cam3.IIE252Q	Cam3.IIWT	E252Q	CRISPR-Cas9	Cam3.IIE252Q
Cam3.IIF446I	Cam3.IIWT	F446I	CRISPR-Cas9	Cam3.IIF446I
Cam3.IIP553L	Cam3.IIWT	P553L	CRISPR-Cas9	Cam3.IIP553L
Cam3.IIP574L	Cam3.IIWT	P574L	CRISPR-Cas9	Cam3.IIP574L
Cam3.IIR561H	Cam3.IIWT	R561H	CRISPR-Cas9	Cam3.IIR561H
Cam3.IIC580Y	Cam3.IIR539T	C580Y	ZFN	Straimer et al.
Cam3.IImdr2 T484I ctrl	Cam3.IIC580Y	C580Y	CRISPR-Cas9	This study
Cam3.IImdr2 T484 rev	Cam3.IIC580Y	C580Y	CRISPR-Cas9	This study
Thai1E252Q	Thai1WT	E252Q	ZFN	This study
Thai1R561H	Thai1WT	R561H	CRISPR-Cas9	This study
Thai1C580Y	Thai1WT	C580Y	ZFN	This study
Thai2R561H	Thai2WT	R561H	ZFN	This study
Thai2C580Y	Thai2WT	C580Y	ZFN	This study
Thai3E252Q	Thai3WT	E252Q	ZFN	This study
Thai4C580Y	Thai4WT	C580Y	ZFN	This study
Thai5E252Q	Thai5WT	E252Q	ZFN	This study
Thai5R561H	Thai5WT	R561H	ZFN	This study
Thai5C580Y	Thai5WT	C580Y	ZFN	This study
CamWTC580Y	CamWT	C580Y	ZFN	Straimer et al.
CamWTfd D193Y	CamWTC580Y	C580Y	CRISPR-Cas9	This study
RF7fd D193Y ctrl	RF7C580Y	C580Y	CRISPR-Cas9	This study
RF7fd D193 rev	RF7C580Y	C580Y	CRISPR-Cas9	This study
aStraimer et al. 2015. K13-propeller mutations confer artemisinin resistance in Plasmodium falciparum clinical isolates. Science 347:428-431. DOI: 10.1126/science.1260867. PMID: 25502314
ctrl, control (denotes line with silent gRNA shield mutations only); rev, revertant (denotes a line in which mutation has been removed by gene editing); WT, wild-type; ZFN, zinc-finger nuclease.
