# Supplementary material for: Plasmodium falciparum K13 mutations in Africa and Asia impact artemisinin resistance and parasite fitness
Source: eLife. 2021 Jul 19;10:e66277. doi: 10.7554/eLife.66277 (PMC8321553; doi:10.7554/eLife.66277)
Supplement: Supplementary file 7. [file elife-66277-supp7.xlsx]

## Sheet: Supplementary file 6
Supplementary file 7. Oligonucleotides used in this study.
Name	Nucleotide sequence (5'-3')	Descriptiona	Lab name
p1	TATTACACATAGCTGATGATCTAG	K13 gRNA fwd	p6558
p2	AAACCTAGATCATCAGCTATGTGT	K13 gRNA rev	p6287
p3	GTGACGTCGATTGATATTAATGTTGGTGGAGC	K13 CRISPR/Cas9 donor amplification fwd	p3984
p4	CCGCATATGGTGCAAACGGAGTGACCAAATCTGGG	K13 CRISPR/Cas9 donor amplification rev	p3986
p5	GAATACGCCAAGATCATCAGCTATGTGTGTTGCTTTTGATAATAAAATTTATGTCATTGG	SDM K13 shield fwd	p6090
p6	GCAACACACATAGCTGATGATCTTGGCGTATTCAAAGGTGCCACCTCTACCC	SDM K13 shield rev	p6091
p7	GATAAGAAAGAACTACAAATGGAAAGAGTACGATTGTACAAAGAATTAGAAAACCG	SDM K13 E252Q fwd	p5174
p8	CGTACTCTTTCCATTTGTAGTTCTTTCTTATCTTTAAATAATTTATCTTTTTCTCG	SDM K13 E252Q rev	p5175
p9	CCCATTAGTAATTTGTATAGGTGGATTTGATGGTGTAGAATATTTAAATTCGATGG	SDM K13 F446I fwd	p4895
p10	CCACCTATACAAATTACTAATGGGAATGGTAAAAATTTAATACCATAAAATTCTGC	SDM K13 F446I fwd	p4896
p11	GATGGCTCTTCTATTATACTGAATGTAGAAGCATATGATCATCGTATGAAAGCATGG	SDM K13 P553L fwd	p6086
p12	TCATATGCTTCTACATTCAGTATAATAGAAGAGCCATCATATCCCCC	SDM K13 P553L rev	p6087
p13	GCATATGATCATCATATGAAAGCATGGGTAGAGGTGGCACCTTTGAATACCCC	SDM K13 R561H fwd	p5176
p14	CCCATGCTTTCATATGATGATCATATGCTTCTACATTCGGTATAATAGAAGAGCC	SDM K13 R561H rev	p5177
p15	GAATACGCTAAGATCATCAGCTATGTGTGTTGCTTTTGATAATAAAATTTATGTCATTGG	SDM K13 P574L + shield fwd	p6092
p16	GCAACACACATAGCTGATGATCTTAGCGTATTCAAAGGTGCCACCTCTACCC	SDM K13 P574L + shield rev	p6093
p17	GAATACGCCAAGATCATCAGCTATATGTGTTGCTTTTGATAATAAAATTTATGTCATTGG	SDM K13 M579I + shield fwd	p6013
p18	GCAACACATATAGCTGATGATCTTGGCGTATTCAAAGGTGCCACCTCTACCC	SDM K13 M579I + shield rev	p6014
p19	GAATACGCCAAGATCATCAGCTATGTATGTTGCTTTTGATAATAAAATTTATGTCATTGG	SDM K13 C580Y + shield fwd	p6015
p20	GCAACATACATAGCTGATGATCTTGGCGTATTCAAAGGTGCCACCTCTACCC	SDM K13 C580Y + shield rev	p6016
p21	GAGGTACCGAGCTCGAATTCGAAACGGAATTAAGTGATGCTAG	K13 CRISPR/Cas9 donor EcoRI In-Fusion fwd	p6655
p22	CGAAAAGTGCCACCTGACGTCAAACGGAGTGACCAAATCTGGG	K13 CRISPR/Cas9 donor AatII In-Fusion rev	p6656
p23	AACATATGTTAAATATTTATTTCTC	CRISPR/Cas9 donor sequencing fwd	p282
p24	AGGGTTATTGTCTCATGAGCGG	CRISPR/Cas9 donor sequencing fwd	p283
p25	AAGCACCGACTCGGTGCCAC	gRNA sequencing rev	p35
p26	GGGAATCTGGTGGTAACAGC	K13 integration primer fwd (5' end)	p6176
p27	CGGAGTGACCAAATCTGGGA	K13 integration primer rev (3' end)	p6175
p28	GGTATTAAATTTTTACCATTCCCATTAGTATTTTGTATAGG	K13 sequencing fwd (internal)	p4186
p29	TAAGTATATAATATTGTGTACATGTTATCCTAAATGTTTTAGAGCTAGAA	fd gRNA In-Fusion fwd	p6156
p30	TTCTAGCTCTAAAACATTTAGGATAACATGTACACAATATTATATACTTA	fd gRNA In-Fusion rev	p6157
p31	ACCGAGCTCGAATTCATGAATATTGTAATACTATTGTTAATAC	fd CRISPR/Cas9 donor amplification / EcoRI In-Fusion fwd	p6239
p32	GTGCCACCTGACGTCCTGCCTATAAAACTTTCTCGTC	fd CRISPR/Cas9 donor amplification / AatII In-Fusion rev	p6238
p33	AAATATATTCTTTTGTGTACATGTTATCCTAAGAGTGATTGTGTGATTG	SDM fd shield fwd	p6429
p34	CAATCACACAATCACTCTTAGGATAACATGTACACAAAAGAATATATTT	SDM fd shield rev	p6430
p35	CAAGGAAGACGAACTACACTACATGTAATTTGTCCTCAATC	SDM fd D193Y fwd	p6437
p36	GATTGAGGACAAATTACATGTAGTGTAGTTCGTCTTCCTTG	SDM fd D193Y rev	p6438
p37	CAATATGAACATAAAGTACAACATTAATATATAGC	CRISPR/Cas9 donor sequencing fwd	p6293
p38	GGGCGACACGGAAATGTTGAATACTC	CRISPR/Cas9 donor sequencing fwd	p6295
p39	CCAAAAAGGCTATTGCATCAATAAACAGTTTGTATAAT	fd integration primer fwd (5' end)	p6630
p40	GAAAATGTAATTATATACATGTGCAACCCAAAC	fd integration primer rev (3' end)	p6631
p41	GCTCGGGCCCATGAATATTGTAATACTATTGTTAATAC	fd sequencing fwd (internal)	p5714
p42	TAAGTATATAATATTGTTATTCCGGCAACAATAGAGTTTTAGAGCTAGAA	mdr2 gRNA In-Fusion fwd	p6720
p43	TTCTAGCTCTAAAACTCTATTGTTGCCGGAATAACAATATTATATACTTA	mdr2 gRNA In-Fusion rev	p6721
p44	ACCGAGCTCGAATTCGTTATGTAATAAAATCAGAAAATCCTC	mdr2 CRISPR/Cas9 donor amplification / EcoRI In-Fusion fwd	p6716
p45	GTGCCACCTGACGTCCAAATCACTAATATCAGTAAATGATTTAATAATAG	mdr2 CRISPR/Cas9 donor amplification / AatII In-Fusion rev	p6717
p46	TTCTGTTTTAATGTATATTATTCCGGCAACAATCGAAGGATTAATAACATGTATTATAT	SDM mdr2 shield fwd	p6732
p47	ATATAATACATGTTATTAATCCTTCGATTGTTGCCGGAATAATATACATTAAAACAGAA	SDM mdr2 shield rev	p6733
p48	CTGTTTTAATGTATATTATTCCGGCAATTATCGAAGGATTAATAACATG	SDM mdr2 T484I + shield fwd	p6869
p49	CATGTTATTAATCCTTCGATAATTGCCGGAATAATATACATTAAAACAG	SDM mdr2 T484I + shield rev	p6870
p50	GTTAACAGAATTGAATACATTAGGAAAGGTGTATGTATTATCCAGACA	mdr2 integration primer fwd (5' end)	p6918
p51	GTACATTATTAAATTCAATACTAACACCGAATTTTTTTTCTTGTGATG	mdr2 integration primer rev (3' end)	p6919
p52	CTTCTAATTTTGCTTATTTAAATTTTTTCC	mdr2 sequencing fwd (internal)	p5778
aShield refers to silent shield mutations introduced at the gRNA cut site to prevent cleavage of the recombinant locus following gene editing.
fwd, forward; rev, reverse; SDM, site-directed mutagenesis.
