# Supplementary material for: Plasmodium falciparum K13 mutations in Africa and Asia impact artemisinin resistance and parasite fitness
Source: eLife. 2021 Jul 19;10:e66277. doi: 10.7554/eLife.66277 (PMC8321553; doi:10.7554/eLife.66277)
Supplement: Supplementary file 8. [file elife-66277-supp8.xlsx]

## Sheet: Supplementary file 7
Supplementary file 8. Description of gene-editing plasmids generated in this study.
Name	Locus	Mutations	Editing method	Lab name
pDC2-cam-coSpCas9-U6-gRNA-K13_bsm-hdhfr	K13	K13 shield mutations	CRISPR/Cas9	gs3297
pDC2-cam-coSpCas9-U6-gRNA-K13_F446I-hdhfr	K13	K13 shield mutations + F446I	CRISPR/Cas9	gs3298
pDC2-cam-coSpCas9-U6-gRNA-K13_P553L-hdhfr	K13	K13 shield mutations + P553L	CRISPR/Cas9	gs3272
pDC2-cam-coSpCas9-U6-gRNA-K13_R561H-hdhfr	K13	K13 shield mutations + R561H	CRISPR/Cas9	gs3512
pDC2-cam-coSpCas9-U6-gRNA-K13_P574L-hdhfr	K13	K13 shield mutations + P574L	CRISPR/Cas9	gs3273
pDC2-cam-coSpCas9-U6-gRNA-K13_M579I-hdhfr	K13	K13 shield mutations + M579Ia	CRISPR/Cas9	gs3264
pDC2-cam-coSpCas9-U6-gRNA-K13_C580Y-hdhfr	K13	K13 shield mutations + C580Y	CRISPR/Cas9	gs3262
pZFN18/20-K13_E252Q-hdhfr	K13	K13 shield mutations + E252Q	ZFN	gs3509
pZFN18/20-K13_R561H-hdhfr	K13	K13 shield mutations + R561H	ZFN	gs3510
pDC2-cam-Cas9-U6-gRNA-fd_rev_D193-hdhfr	fd	fd shield mutations	CRISPR/Cas9	gs3123
pDC2-cam-Cas9-U6-gRNA-fd_D193Y-hdhfr	fd	fd shield mutations + D193Y	CRISPR/Cas9	gs3114
pDC2-cam-Cas9-U6-gRNA-mdr2_T484-hdhfr	mdr2	mdr2 shield mutationsb	CRISPR/Cas9	gs3277
pDC2-cam-Cas9-U6-gRNA-PfMdr2_T484I-hdhfr	mdr2	mdr2 shield mutations + T484Ib	CRISPR/Cas9	gs3286
aK13 donor sequence harbors both CRISPR/Cas9 and ZFN bsm in addition to the M579I mutation.
bmdr2 donor sequence also harbors the S208N/G299D/F423Y mutations found in all parental lines.
ZFN, zinc-finger nuclease.
