# Supplementary material for: Plasmodium falciparum K13 mutations in Africa and Asia impact artemisinin resistance and parasite fitness
Source: eLife. 2021 Jul 19;10:e66277. doi: 10.7554/eLife.66277 (PMC8321553; doi:10.7554/eLife.66277)
Supplement: Supplementary file 9. [file elife-66277-supp9.xlsx]

## Sheet: Supplementary file 8
Supplementary file 9. Real-Time PCR (qPCR) primers and probes used in this study.
Name	Nucleotide sequence (5'-3')	Description
p7251	TCGTATGAAAGCATGGGTAGAG	K13 qPCR fwd used for positions 579 and 580
p8380	TTGGGGGATATGATGGCTCT	K13 qPCR fwd used for position 561
p8380	CCATTAGTTCCACCAATGACATAAA	K13 qPCR rev
p7253	FAM-5'-CATCAGCTATGTGTGTTGCT-3'-MGB-EclipseDLP	K13 WT probe for M579 and C580 with 6-FAM and MGB-Eclipse
p8382	FAM-5'-ATGATCATCGTATGAAAGC-3'-MGB-EclipseDLP	K13 WT probe for R561 with 6-FAM and MGB-Eclipse
p8383	HEX-5'-ATGATCATCATATGAAAGC-3'-MGB-EclipseDLP	K13 561H (mutant) probe with 6-HEX and MGB-Eclipse
p7373	HEX-5'-CATCAGCTATATGTGTTGCT-3'-MGB-EclipseDLP	K13 579I (mutant) probe with 6-HEX and MGB-Eclipse
p7254	HEX-5'-ATCATCAGCTATGTATGTTGCT-3'-MGB-EclipseDLP	K13 580Y (mutant) probe with 6-HEX and MGB-Eclipse
fwd, forward; rev, reverse; WT, wild-type.
